# Supplementary material
Source: MDPI journal article supplement (https://www.mdpi.com/search?q=biomimetics-04-00024)
Supplement: s001 [file biomimetics-04-00024-s001.pdf]

# Supplementary Materials: Synthesis and Mechanochemical Activity of Peptide-Based Cu(I) Bis(*N*-Heterocyclic Carbene) Complexes

Sebastian Funtan, Philipp Michael and Wolfgang H. Binder \*

Macromolecular Chemistry, Institute of Chemistry, Faculty of Natural Science II, Martin Luther University Halle-Wittenberg, Von-Danckelmann-Platz 4, 06120 Halle (Saale), Germany; sebastian.funtan@chemie.uni-halle.de (S.F.); philipp.michael@chemie.uni-halle.de (P.M.)

\* Correspondence: wolfgang.binder@chemie.uni-halle.de; Tel.: +49-345-552-5930

## Table of contents

1. Materials
2. Characterization of 11-bromoundecanoic acid methyl ester (1)
3. Characterization of 3-(11-methoxy-11-oxoundecyl)-1-methyl-1*H*-imidazolium bromide (2)
4. Characterization of [Cu(C<sub>10</sub>COOMe-NHC)<sub>2</sub>]Br (3)
5. Characterization of [Cu(C<sub>10</sub>COOH-NHC)<sub>2</sub>]Br (4)
6. Characterization of *N*-(*tert*-butoxycarbonyl)-3-bromopropylamine (5)
7. Characterization of 3-[3-[[1,1-dimethylethoxy)carbonyl]amino]propyl]-1-methyl-1*H*-imidazolium bromide (6)
8. Characterization of [Cu(C<sub>3</sub>NHBoc-NHC)<sub>2</sub>]Br (7)
9. Characterization of [Cu(C<sub>3</sub>NH<sub>2</sub>-NHC)<sub>2</sub>]Br (8)
10. Synthesis and characterization of glycine methyl ester hydrochloride (9)
11. Synthesis and characterization of L-valine methyl ester hydrochloride (10)
12. Characterization of [Cu(C<sub>10</sub>COOH-Gly-NHC)<sub>2</sub>]Br (11)
13. Characterization of [Cu(C<sub>10</sub>COOH-Val-NHC)<sub>2</sub>]Br (12)
14. Characterization of the polymeric catalyst (13)
15. Synthesis and characterization of benzyl azide (14)
16. Synthesis and characterization of 3-(10-carboxydecyl)-1-methyl-1*H*-imidazolium bromide

## 1. Materials

The following chemicals were purchased from Sigma-Aldrich: 1-methylimidazole (99%), copper(I) oxide (97%), lithium hydroxide monohydrate, 3-bromopropan-1-amine hydrobromide (98%), triethylamine (Et<sub>3</sub>N) (99%), trifluoroacetic acid (99%), thionyl chloride (99%), *N,N'*-dicyclohexylcarbodiimide (DCC) (99%), pentafluorophenol (99%), *N,N*-diisopropylethylamine (DIPEA) (99%), and sodium azide (99.5%). 6-Bromohexanoic acid (98%) and 11-bromoundecanoic acid (99%) were purchased from Tokyo Chemical Industry Co., Ltd., and di-*tert*-butyl dicarbonate (99%) and *N'*-(3-dimethylaminopropyl)-*N'*-ethylcarbodiimide hydrochloride (EDC-HCl) (98%) were obtained from Carbolution Chemicals GmbH. Sodium chloride, sodium sulfate, glycine (>99%) and L-valine (>99%) were purchased from Carl Roth GmbH & Co. KG. The following chemicals were purchased from Fluka: methanesulfonic acid (98%) and benzyl bromide (98%). Hydrochloric acid (37%) and sodium bicarbonate were obtained from Grüssing GmbH, and magnesium sulfate (99%) was purchased from Alfa Aesar. High performance liquid chromatography (HPLC) grade methanol was obtained from VWR, and HPLC grade dimethylformamide (DMF) was obtained from VWR BDH Prolabo. Ce(SO<sub>4</sub>)·4 H<sub>2</sub>O and (NH<sub>4</sub>)<sub>6</sub>Mo<sub>7</sub>O<sub>24</sub>·4 H<sub>2</sub>O were obtained from VEB. Lithium(I) bis(trifluoromethanesulfonyl)imide (LiTf<sub>2</sub>N) was purchased from J&K Chemicals Ltd. Deuterated chloroform (CDCl<sub>3</sub>), deuterated dimethyl sulfoxide (DMSO-d<sub>6</sub>) and deuterated tetrahydrofuran (THF-d<sub>8</sub>) were purchased from Chemotrade GmbH.

## 2. Characterization of 11-bromoundecanoic acid methyl ester (1)

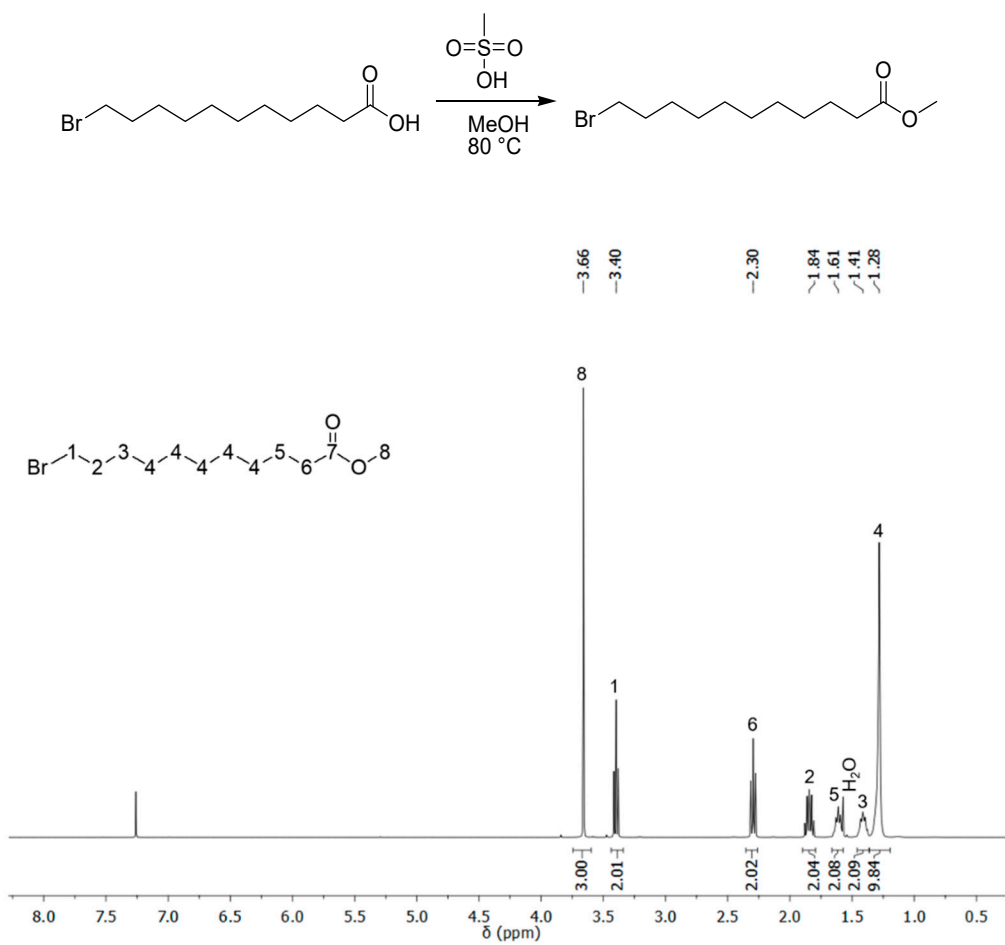

**Figure S1.** <sup>1</sup>H NMR spectrum of 11-bromoundecanoic acid methyl ester (1).

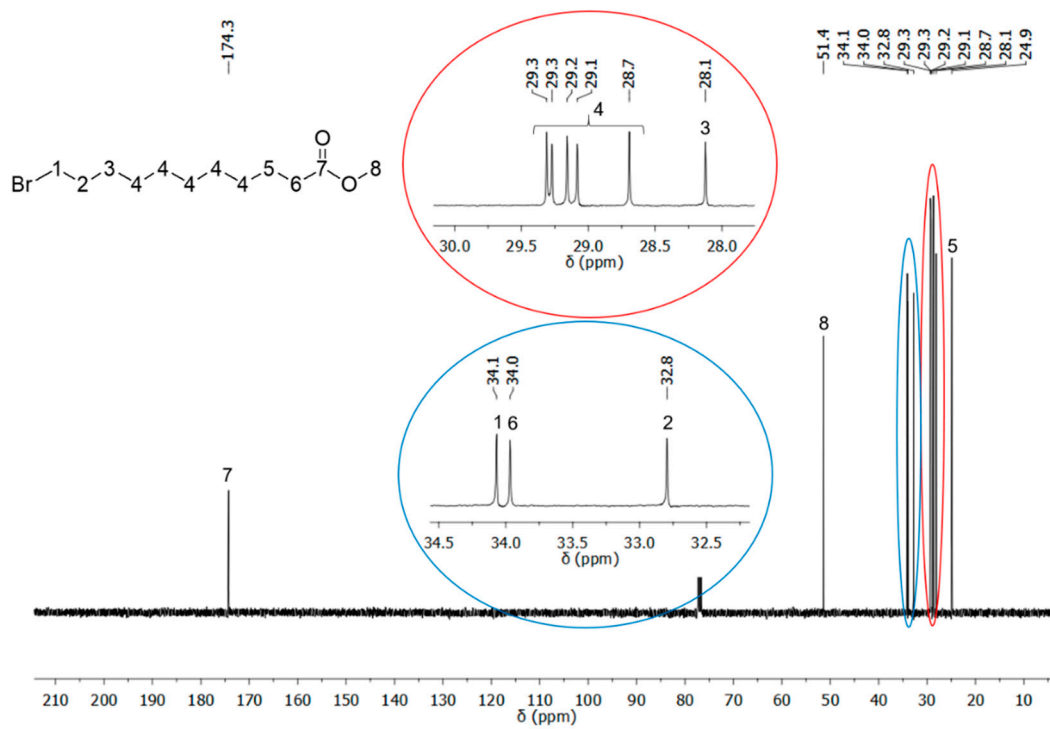

Figure S2.  $^{13}\text{C}$  NMR spectrum of 11-bromoundecanoic acid methyl ester (1).

### 3. Characterization of 3-(11-methoxy-11-oxoundecyl)-1-methyl-1*H*-imidazolium bromide (2)

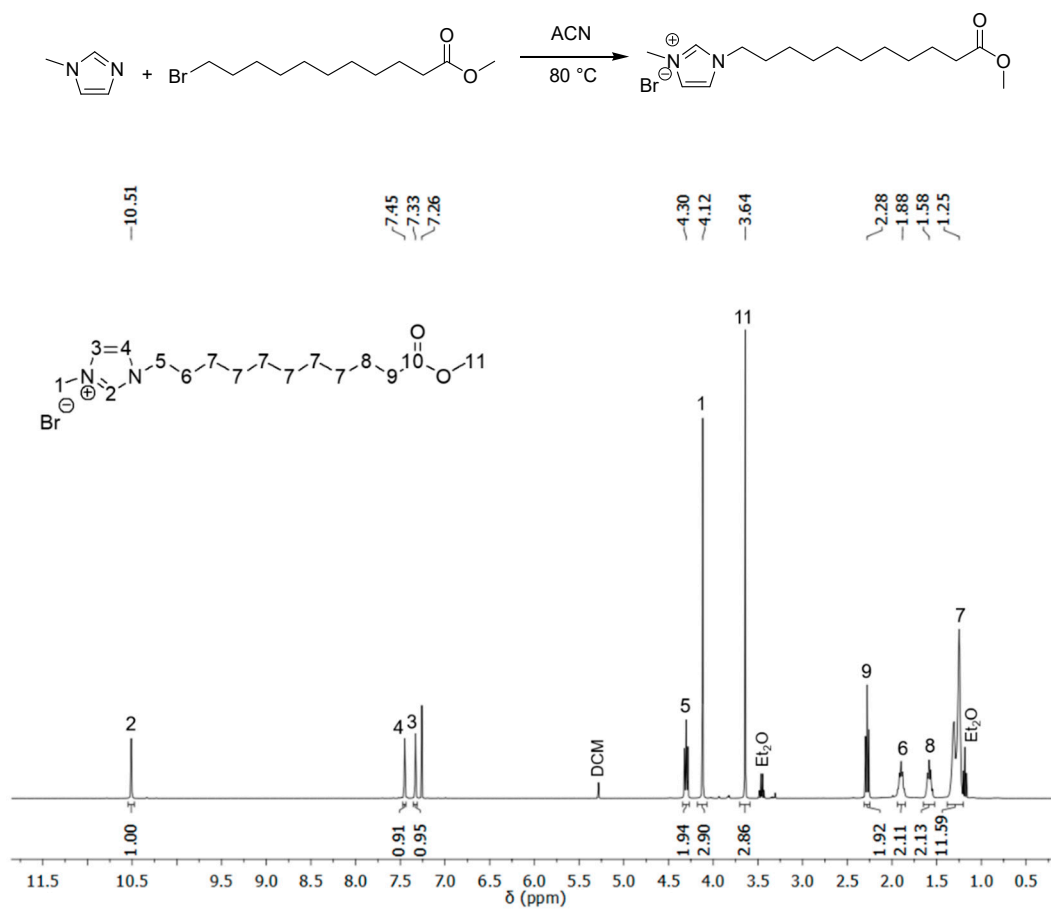

**Figure S3.** <sup>1</sup>H NMR spectrum of 3-(11-methoxy-11-oxoundecyl)-1-methyl-1*H*-imidazolium bromide (2).

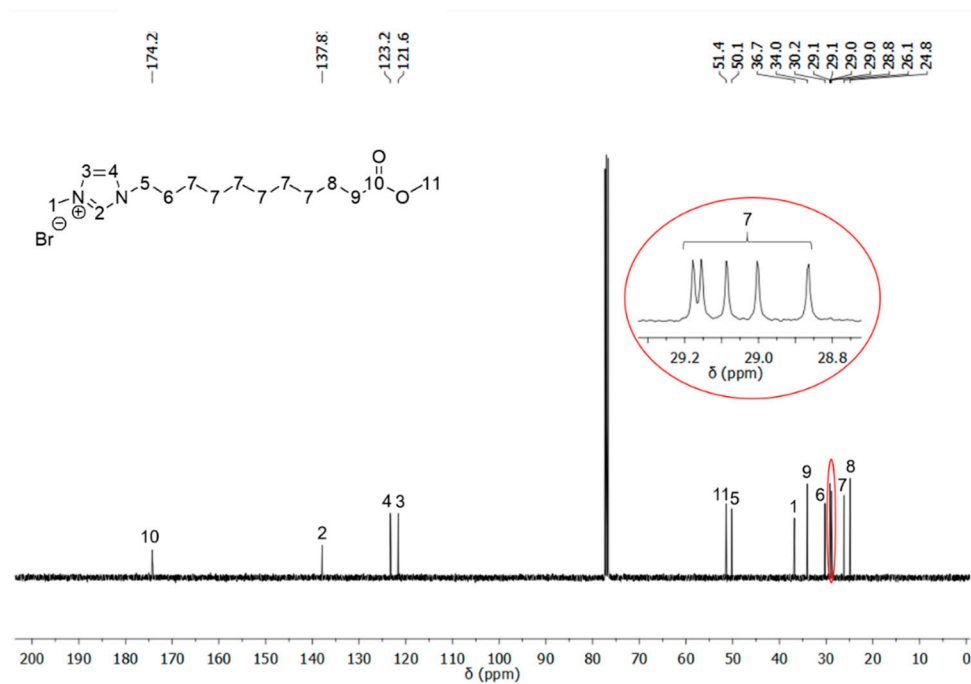

**Figure S4.**  $^{13}\text{C}$  NMR spectrum of 3-(11-methoxy-11-oxoundecyl)-1-methyl-1H-imidazolium bromide (2).

#### 4. Characterization of $[\text{Cu}(\text{C}_{10}\text{COOMe-NHC})_2]\text{Br}$ (3) [1]

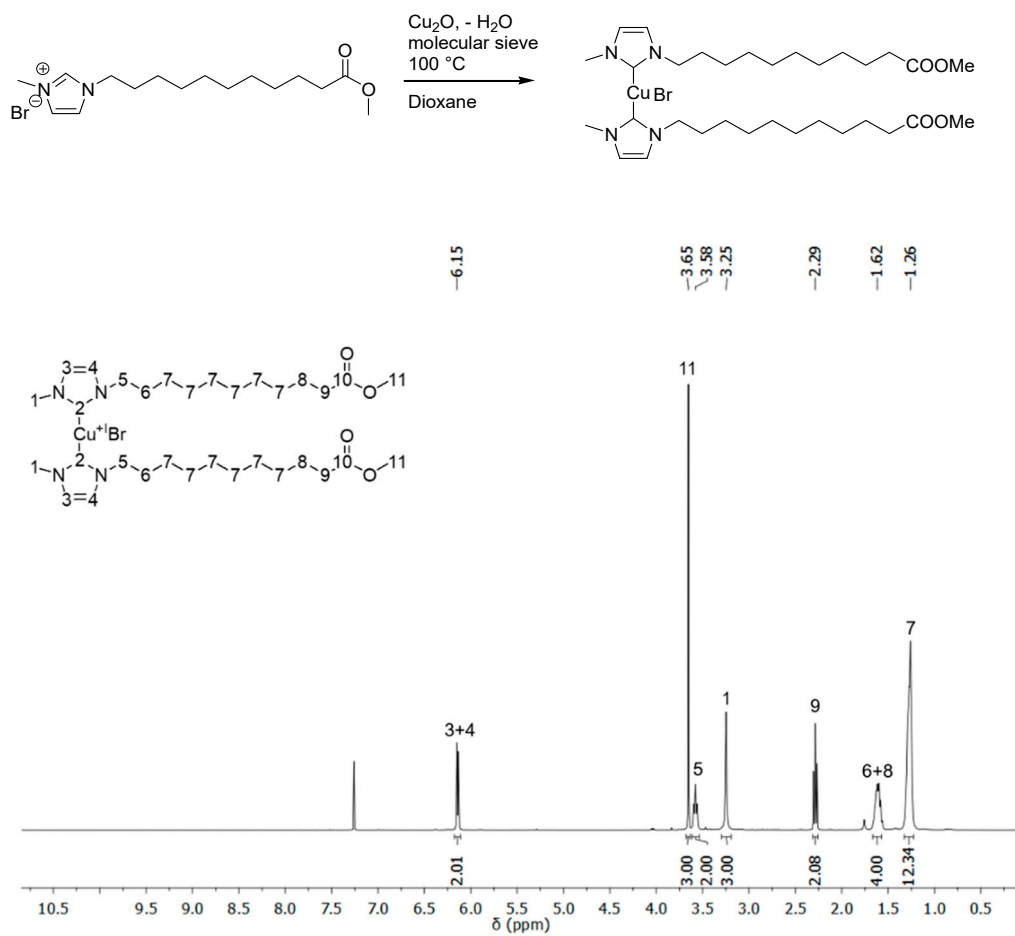

Figure S5.  $^1\text{H}$  NMR spectrum of  $[\text{Cu}(\text{C}_{10}\text{COOMe-NHC})_2]\text{Br}$  (3).

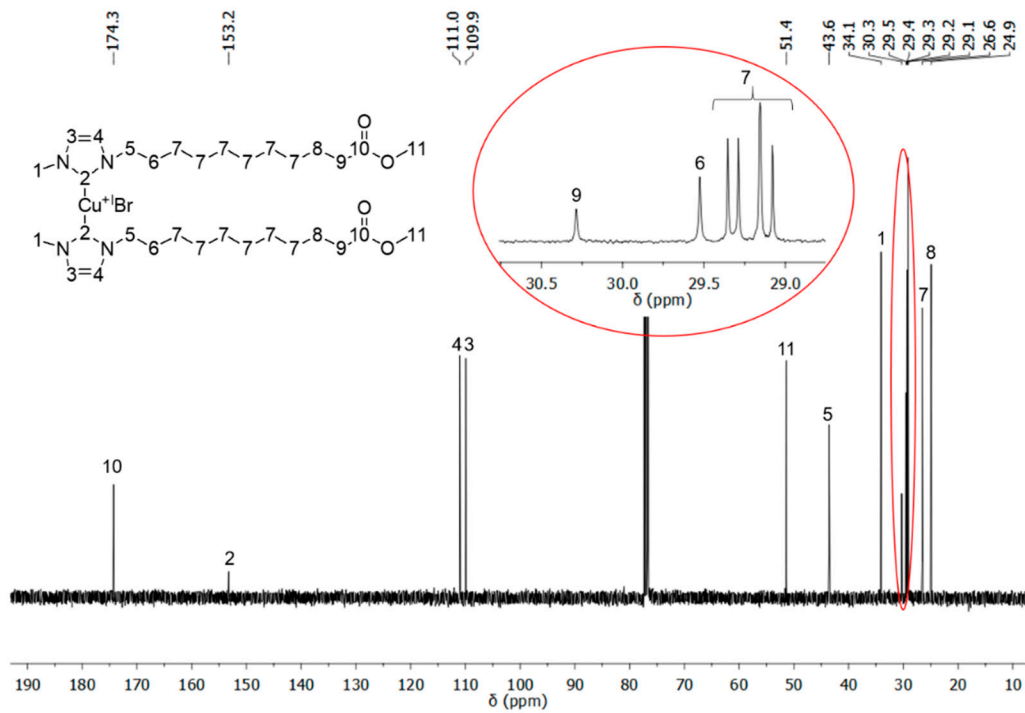

Figure S6.  $^{13}\text{C}$  NMR spectrum of  $[\text{Cu}(\text{C}_{10}\text{COOMe-NHC})_2]\text{Br}$  (3).



### 5. Characterization of $[\text{Cu}(\text{C}_{10}\text{COOH-NHC})_2]\text{Br}$ (4) [2]

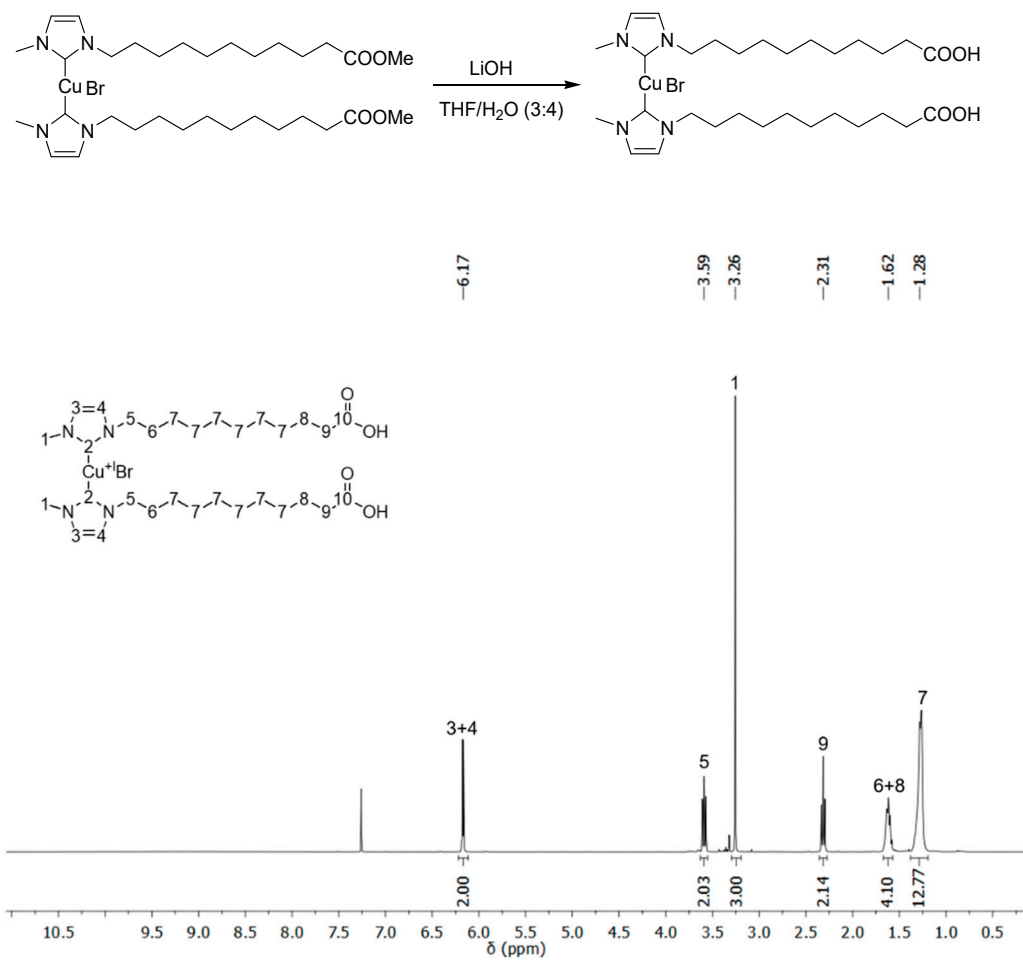

**Figure S7.**  $^1\text{H}$  NMR spectrum of  $[\text{Cu}(\text{C}_{10}\text{COOH-NHC})_2]\text{Br}$  (4).

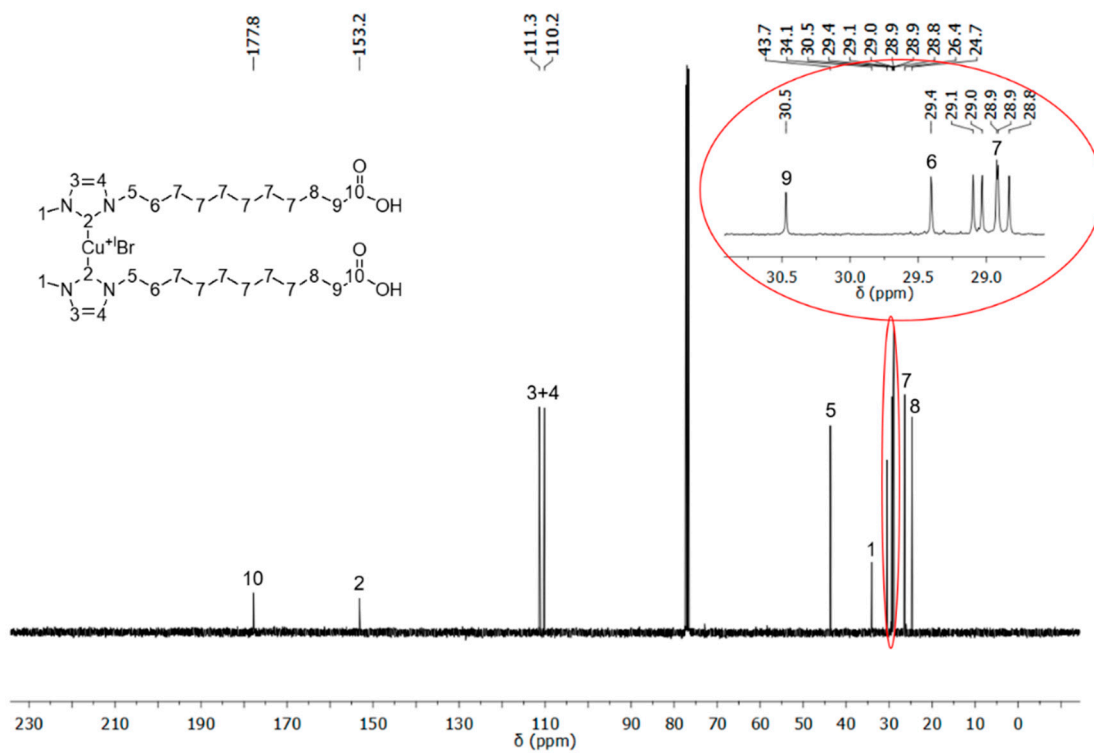

**Figure S8.**  $^{13}\text{C}$  NMR spectrum of  $[\text{Cu}(\text{C}_{10}\text{COOH-NHC})_2]\text{Br}$  (4).

## 6. Characterization of *N*-(*tert*-butoxycarbonyl)-3-bromopropylamine (5) [3]

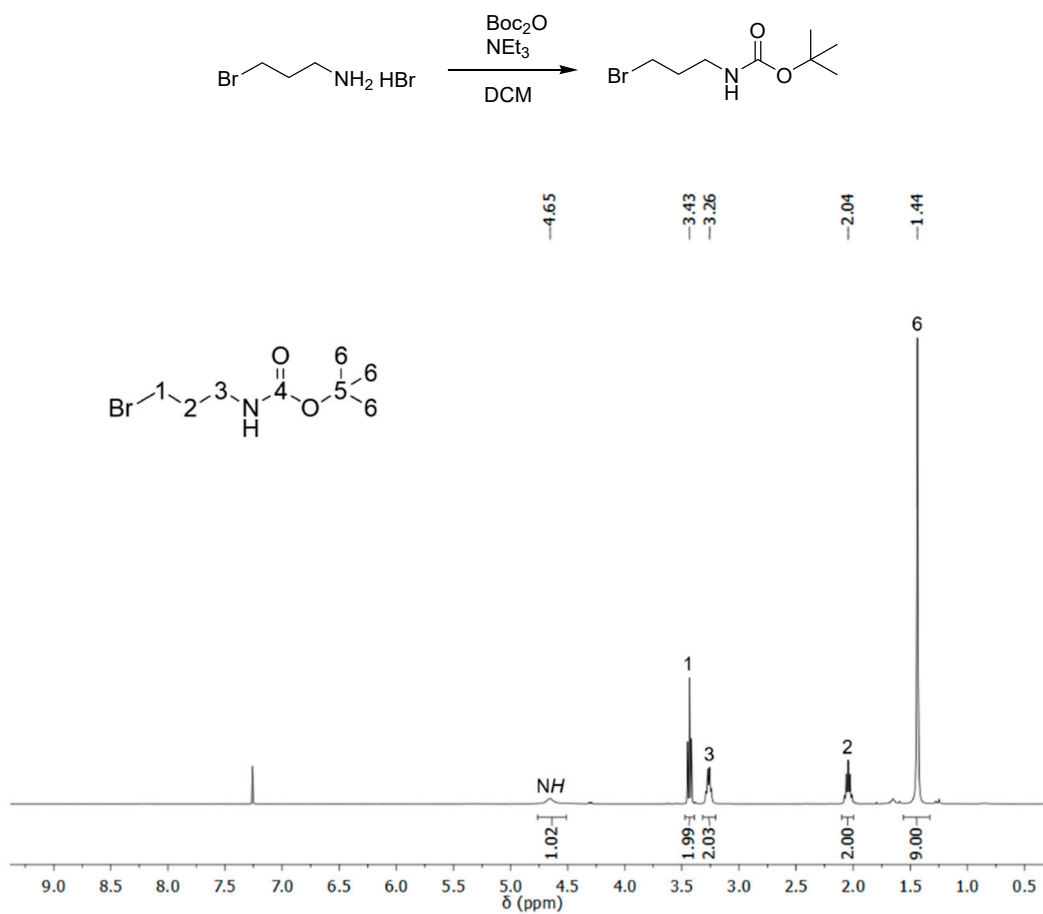

Figure S9. <sup>1</sup>H NMR spectrum of *N*-(*tert*-butoxycarbonyl)-3-bromopropylamine (5).

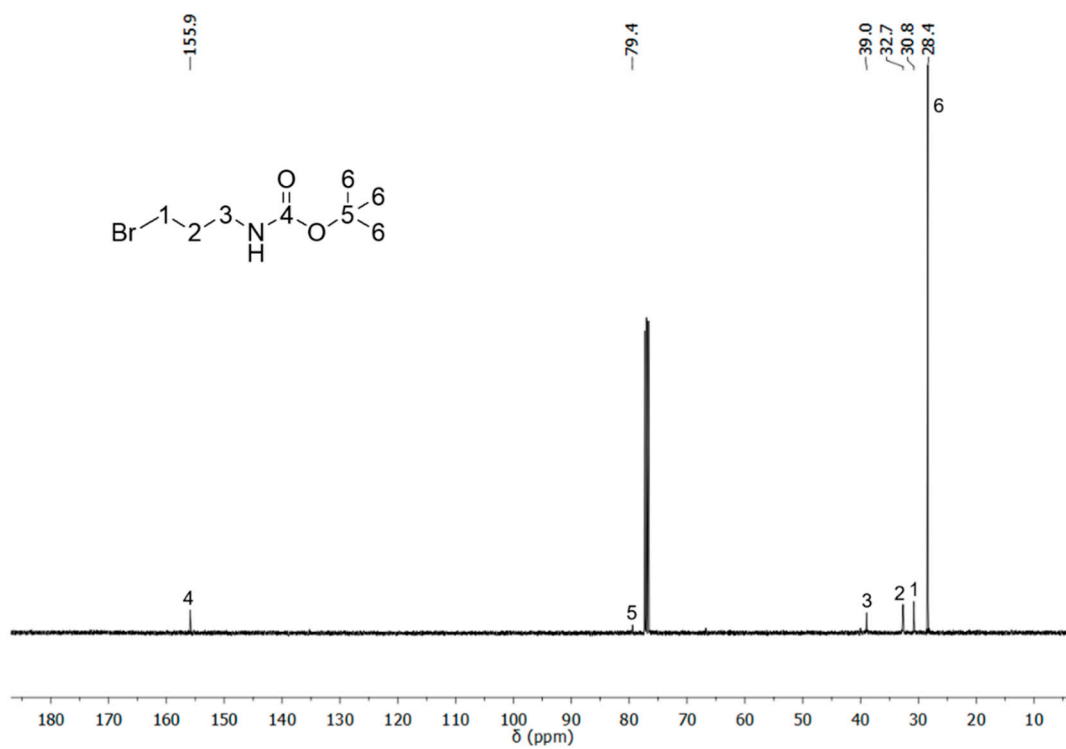

**Figure S10.**  $^{13}\text{C}$  NMR spectrum of *N*-(*tert*-butoxycarbonyl)-3-bromopropylamine (5).

7. Characterization of 3-[3-[[1,1-dimethylethoxy)carbonyl]amino]propyl]-1-methyl-1*H*-imidazolium bromide (6)

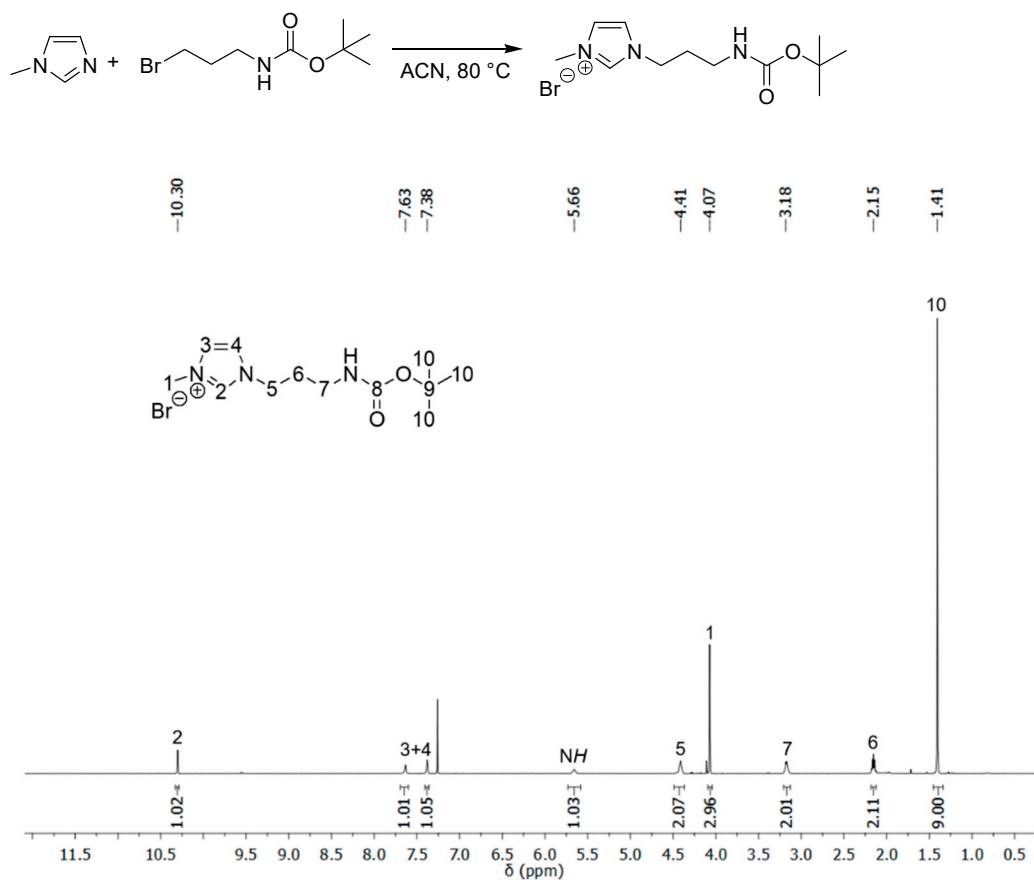

**Figure S11.** <sup>1</sup>H NMR spectrum of 3-[3-[[1,1-dimethylethoxy)carbonyl]amino]propyl]-1-methyl-1*H*-imidazolium bromide (6).

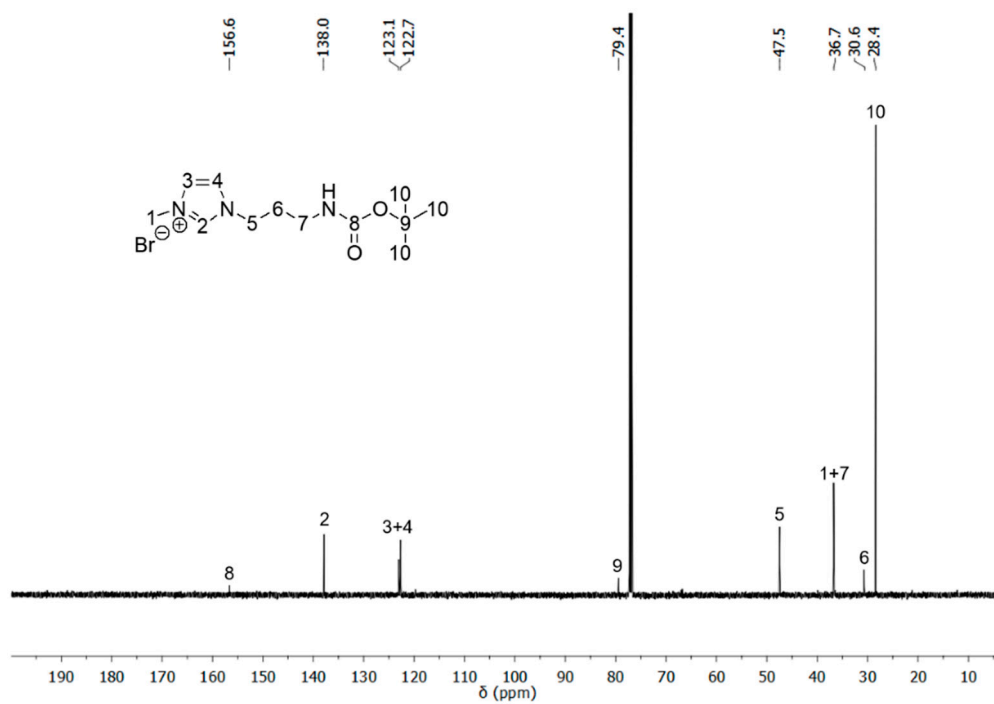

**Figure S12.** <sup>13</sup>C NMR spectrum of 3-[3-[[[(1,1-dimethylethoxy)carbonyl]amino]propyl]-1-methyl-1H-imidazolium bromide (**6**).

### 8. Characterization of $[\text{Cu}(\text{C}_3\text{NHBoc-NHC})_2]\text{Br}$ (7) [1]

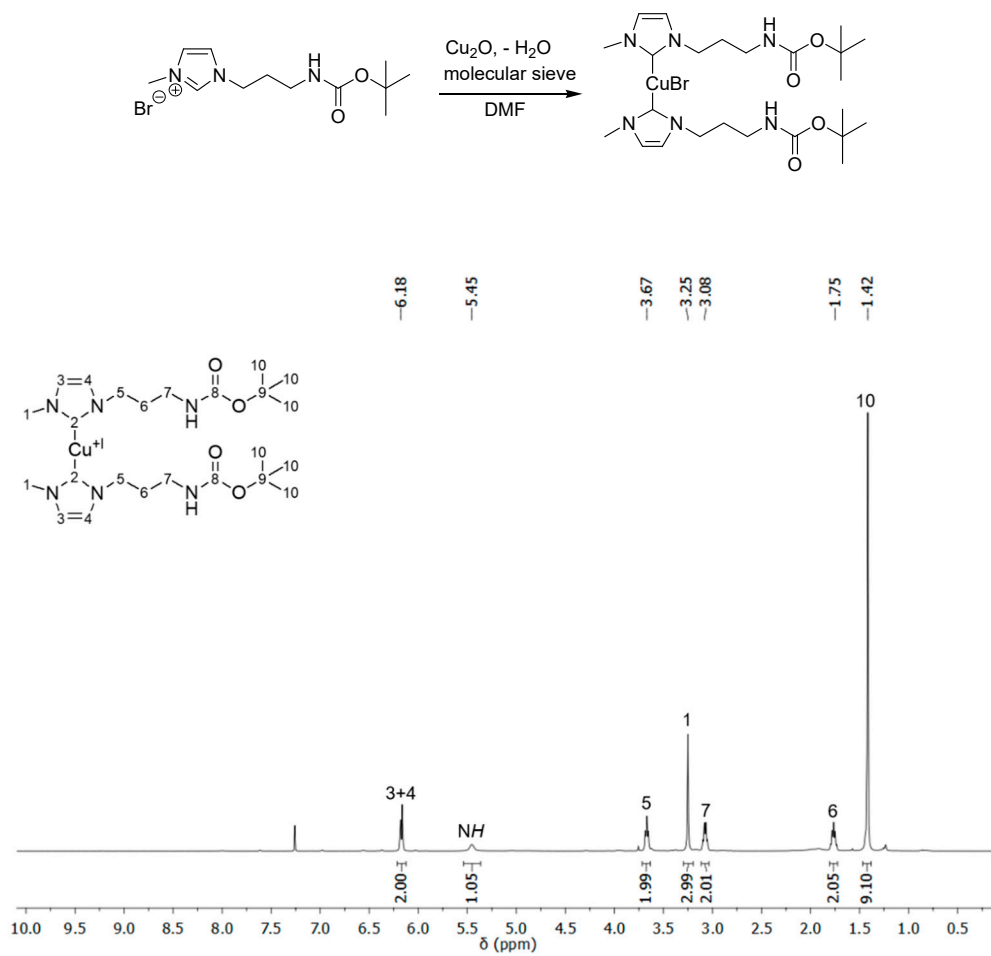

**Figure S13.**  $^1\text{H}$  NMR spectrum of  $[\text{Cu}(\text{C}_3\text{NHBoc-NHC})_2]\text{Br}$  (7).

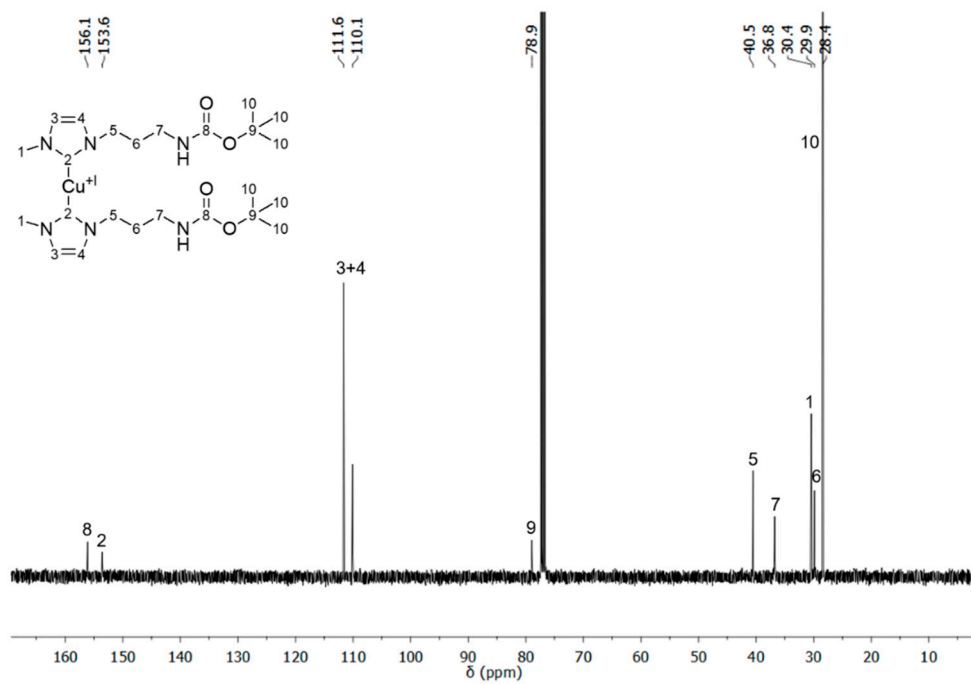

Figure S14.  $^{13}\text{C}$  NMR spectrum of  $[\text{Cu}(\text{C}_3\text{NHBoc-NHC})_2]\text{Br}$  (7).



## 9. Characterization of $[\text{Cu}(\text{C}_3\text{NH}_2\text{-NHC})_2]\text{Br}$ (8)

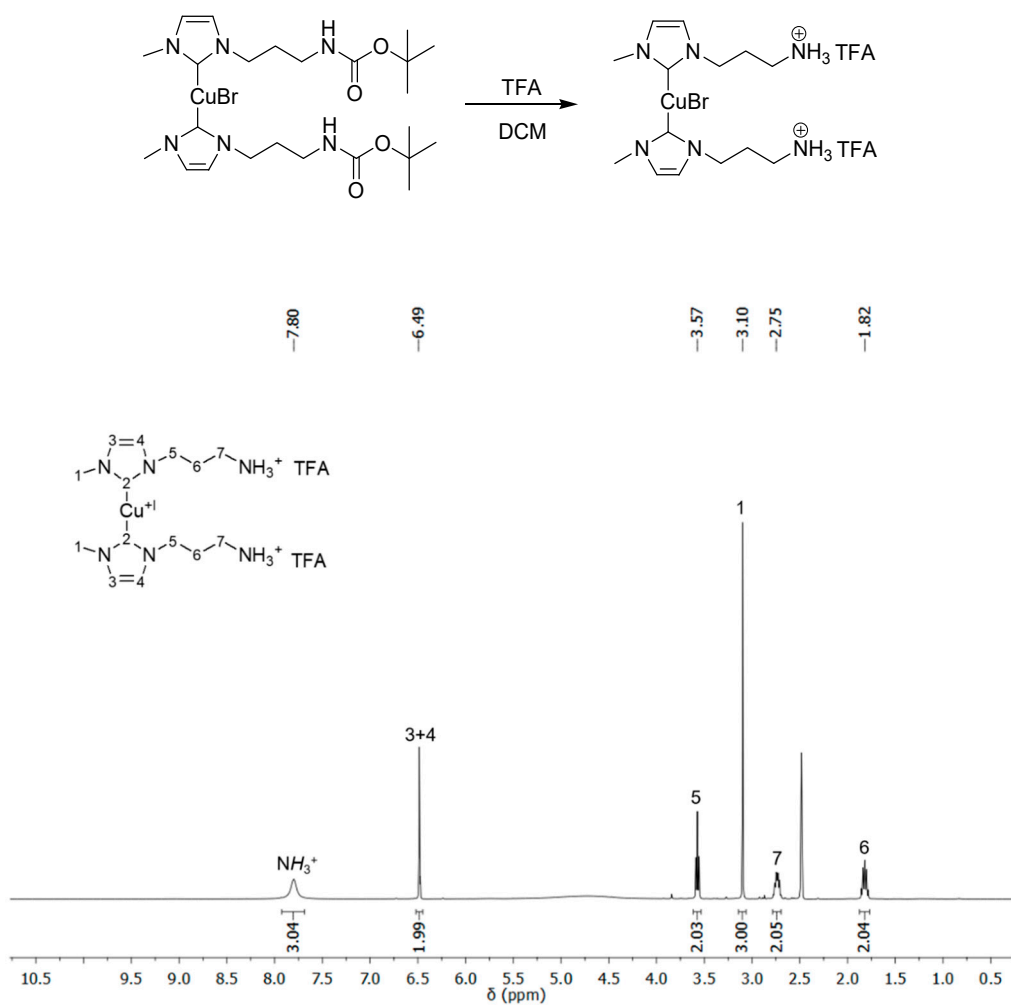

Figure S15.  $^1\text{H}$  NMR spectrum of  $[\text{Cu}(\text{C}_3\text{NH}_2\text{-NHC})_2]\text{Br}$  (8).

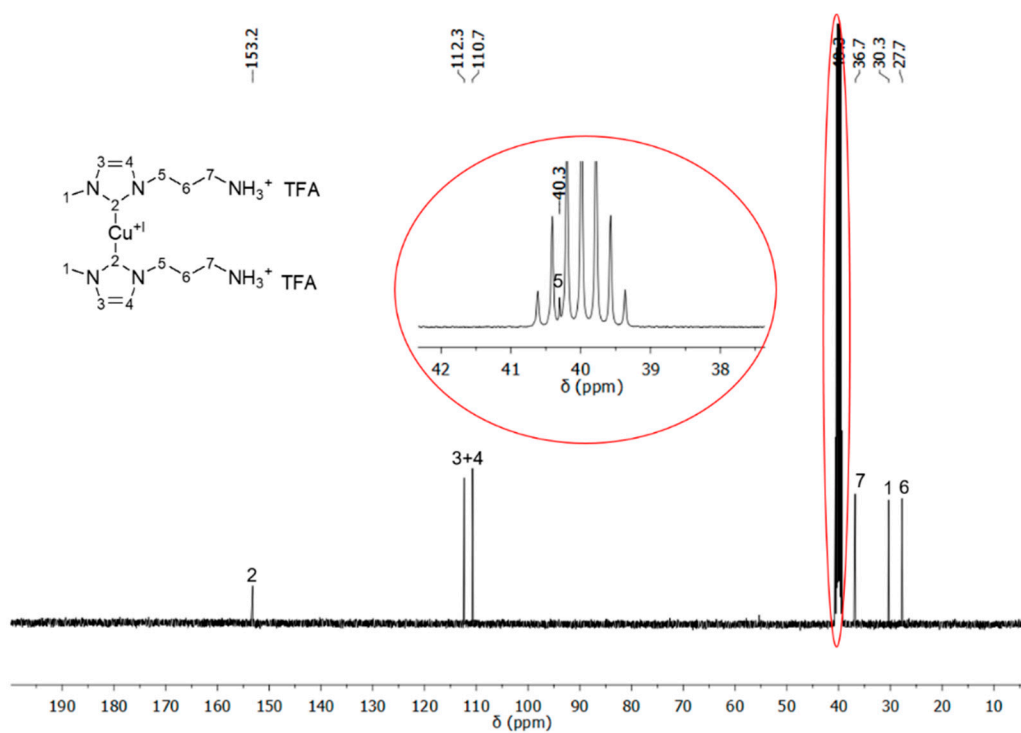

Figure S16.  $^{13}\text{C}$  NMR spectrum of  $[\text{Cu}(\text{C}_3\text{NH}_2\text{-NHC})_2]\text{Br}$  (8).

## 10. Synthesis and characterization of glycine methyl ester hydrochloride (9) [4]

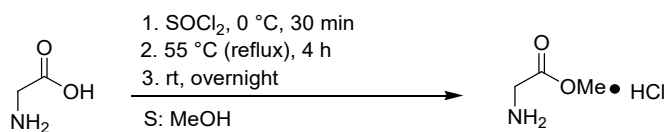

Glycine (5.0 g, 66.6 mmol) was dissolved in MeOH (65.0 mL) and cooled down to 0 °C before SOCl<sub>2</sub> (8.70 g, 5.3 mL, 73.3 mmol) was slowly added. Subsequently the reaction mixture was heated to 55 °C for 4 h and then was cooled down to room temperature (rt). After stirring overnight, the solvent and the excess of SOCl<sub>2</sub> were removed under vacuum. Recrystallization from MeOH yielded the pure product as white crystalline needles. Yield: 6.58 g, 52.37 mmol, 79%.

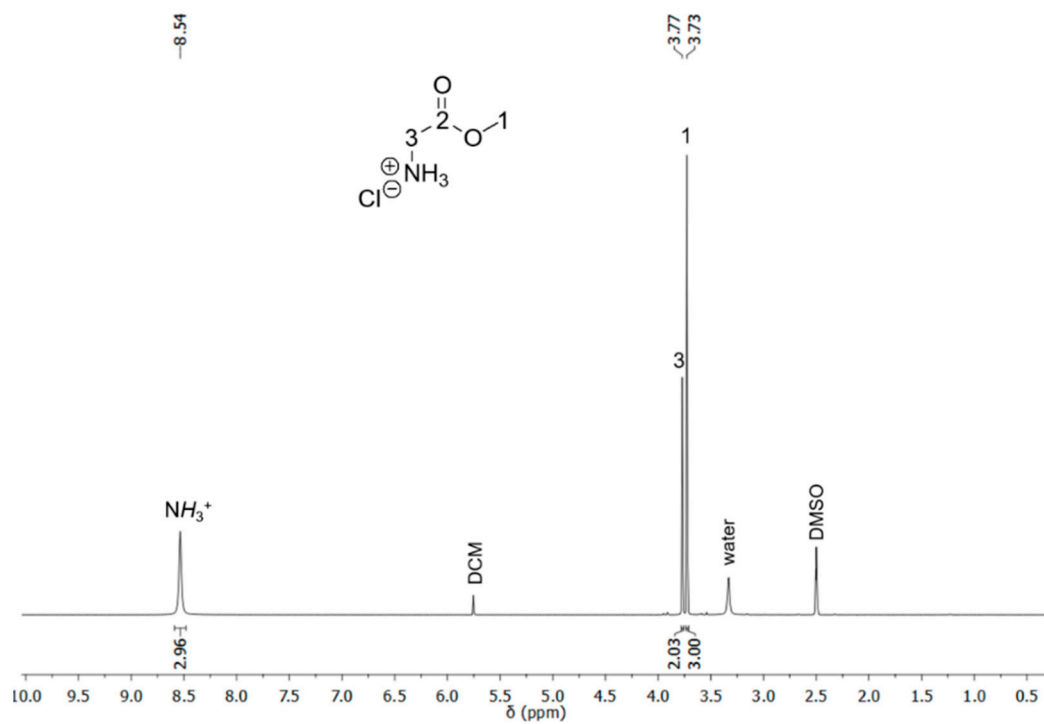

**Figure S17.**  $^1\text{H}$  NMR spectrum of glycine methyl ester hydrochloride (9).

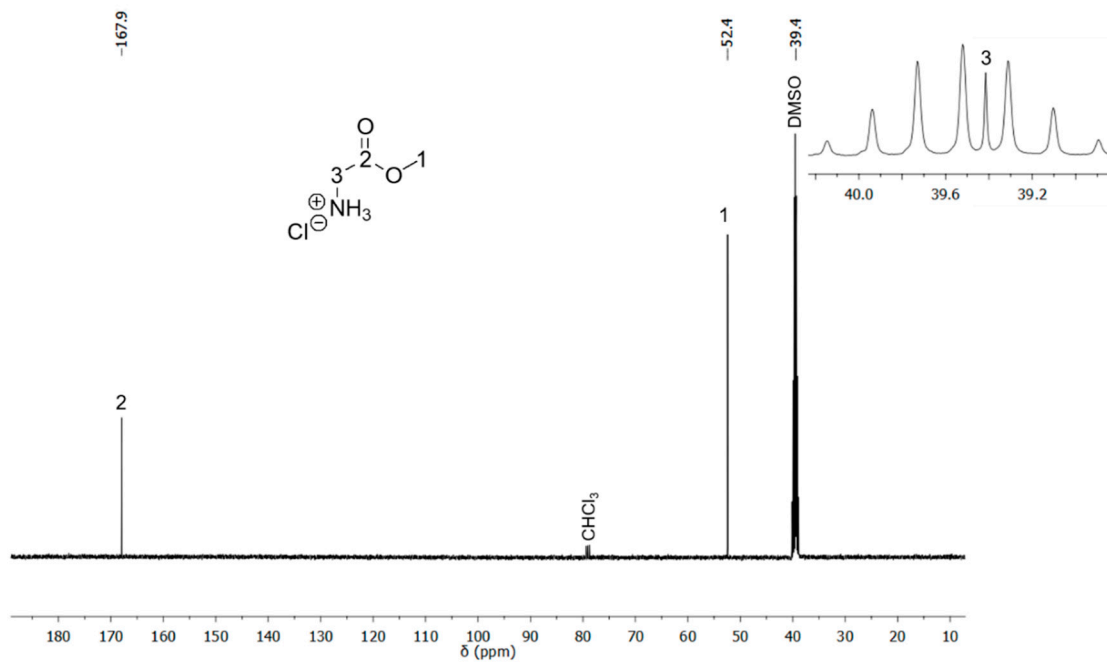

**Figure S18.**  $^{13}\text{C}$  NMR spectrum of glycine methyl ester hydrochloride (9).

## 11. Synthesis and characterization of L-valine methyl ester hydrochloride (10) [5]

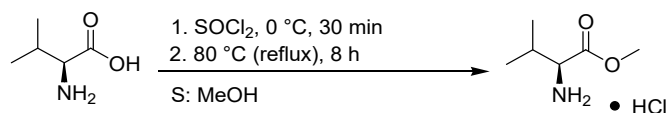

L-Valine (5.0 g, 42.67mmol) was dissolved in dry methanol (60.0 mL) and was cooled down to 0 °C. Freshly distilled thionyl chloride (7.6 g, 4.64 mL, 64.2 mmol) was slowly added and after stirring for 30 min the temperature was increased to 80 °C and the mixture was refluxed for another 8 h. After removal of the solvent and the excess of thionyl chloride, the product was recrystallized from methanol followed by filtration to obtain the pure product as a colorless powder. Yield: 6.21 g, 37.1 mmol, 87%.

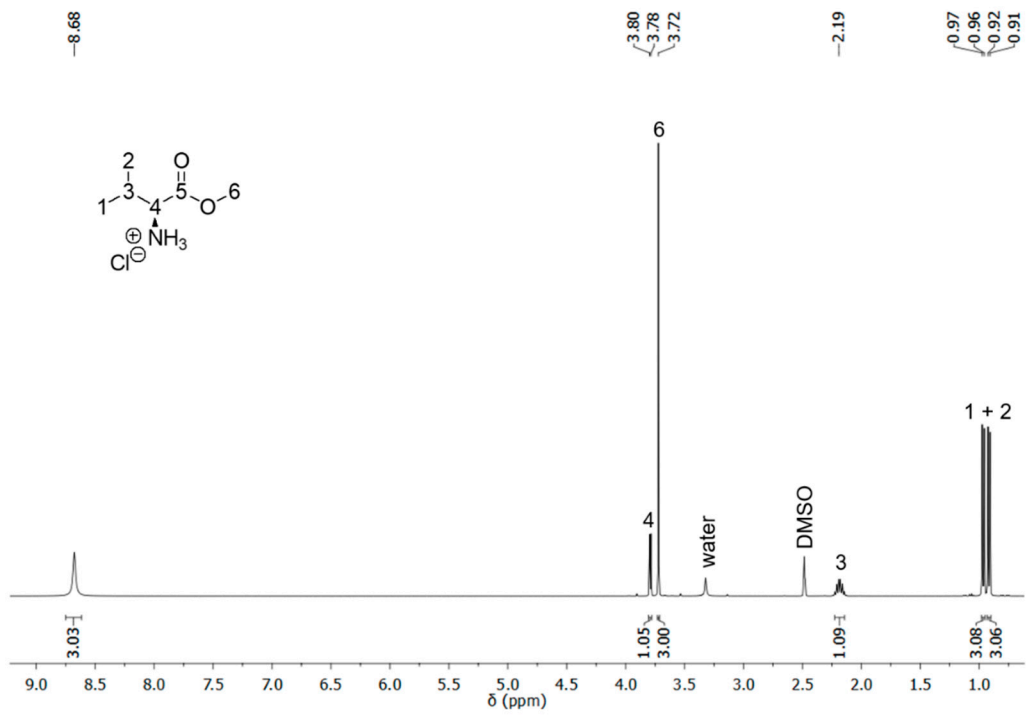

**Figure S19.** <sup>1</sup>H NMR spectrum of L-valine methyl ester hydrochloride (10).

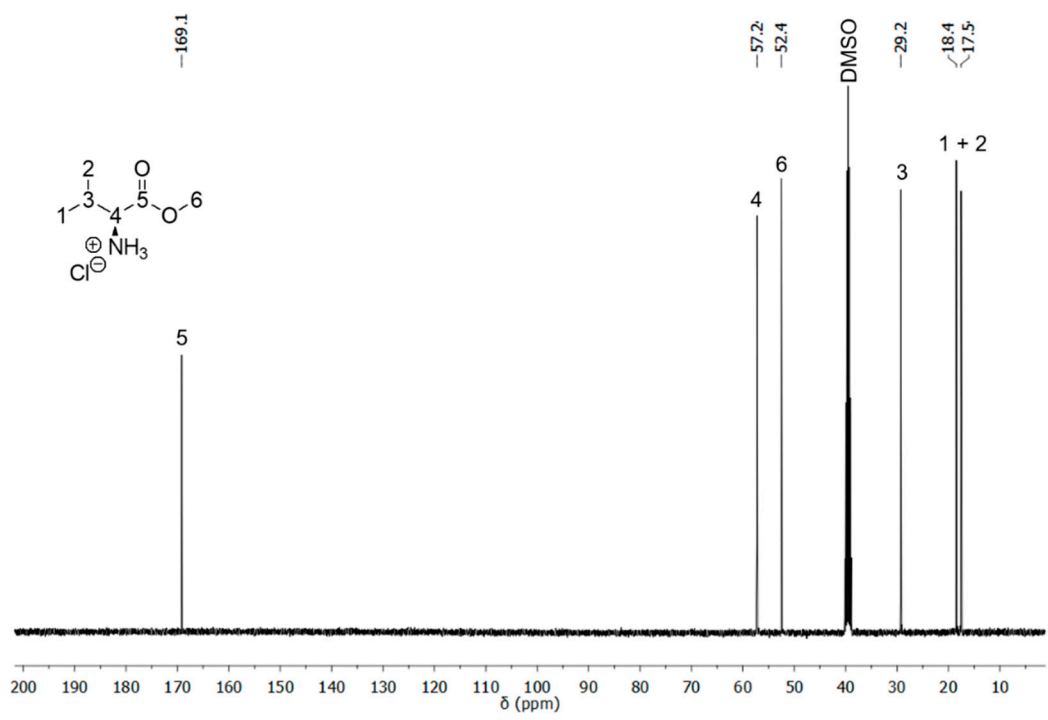

Figure S20.  $^{13}\text{C}$  NMR spectrum of L-valine methyl ester hydrochloride (10).



## 12. Characterization of $[\text{Cu}(\text{C}_{10}\text{COOH-Gly-NHC})_2]\text{Br}$ (**11**) [6,7]

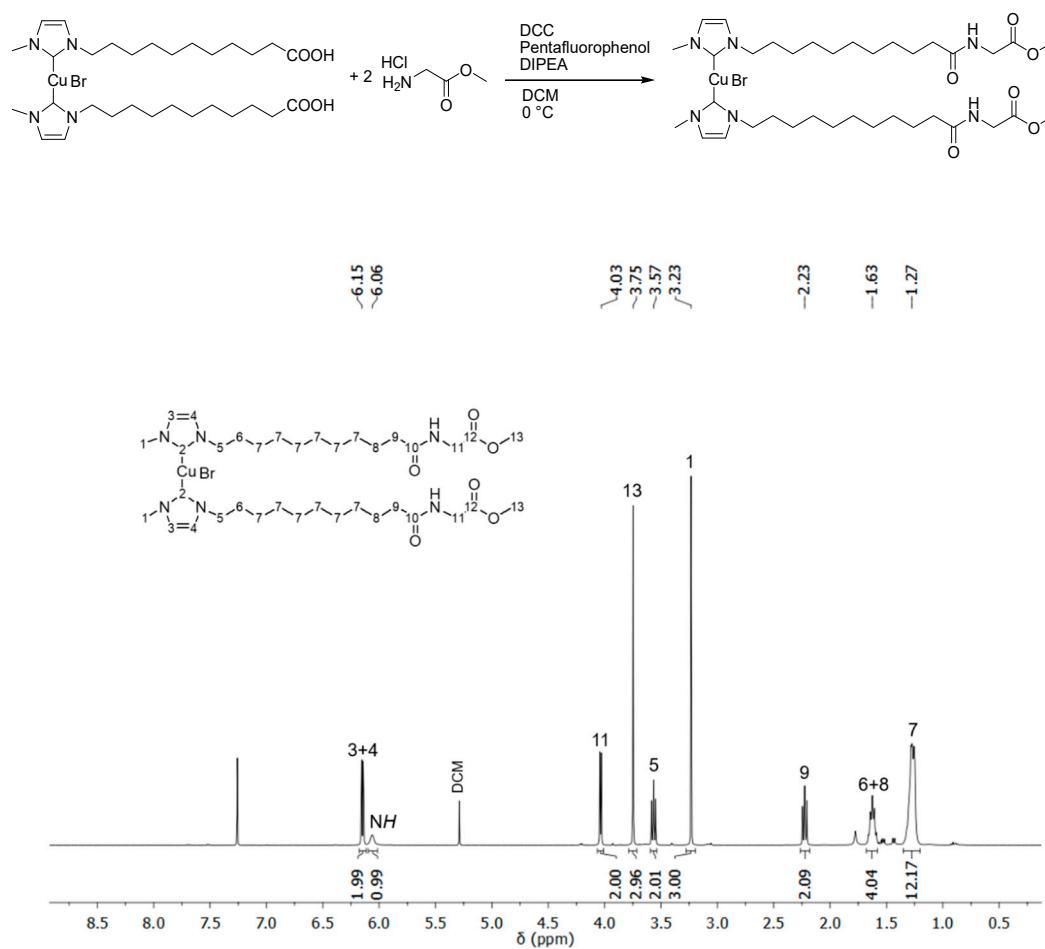

**Figure S1.**  $^1\text{H}$  NMR spectrum of  $[\text{Cu}(\text{C}_{10}\text{COOH-Gly-NHC})_2]\text{Br}$  (**11**).

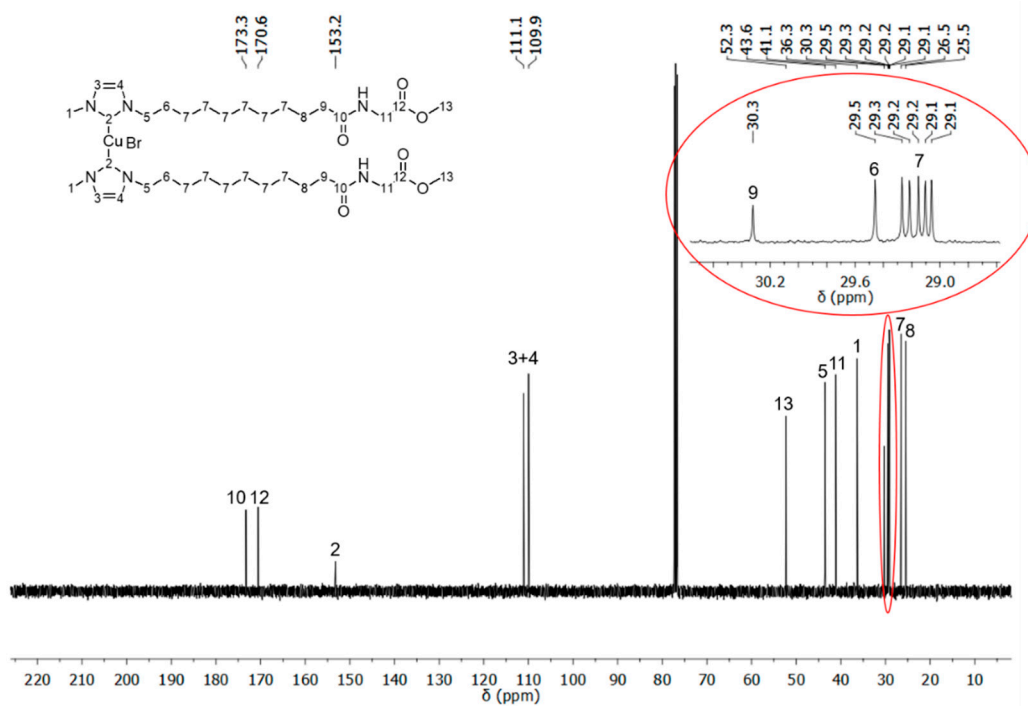

Figure S22.  $^{13}\text{C}$  NMR spectrum of  $[\text{Cu}(\text{C}_{10}\text{COOH-Gly-NHC})_2]\text{Br}$  (11).

### 13. Characterization of $[\text{Cu}(\text{C}_{10}\text{COOH-Val-NHC})_2]\text{Br}$ (**12**) [6,7]

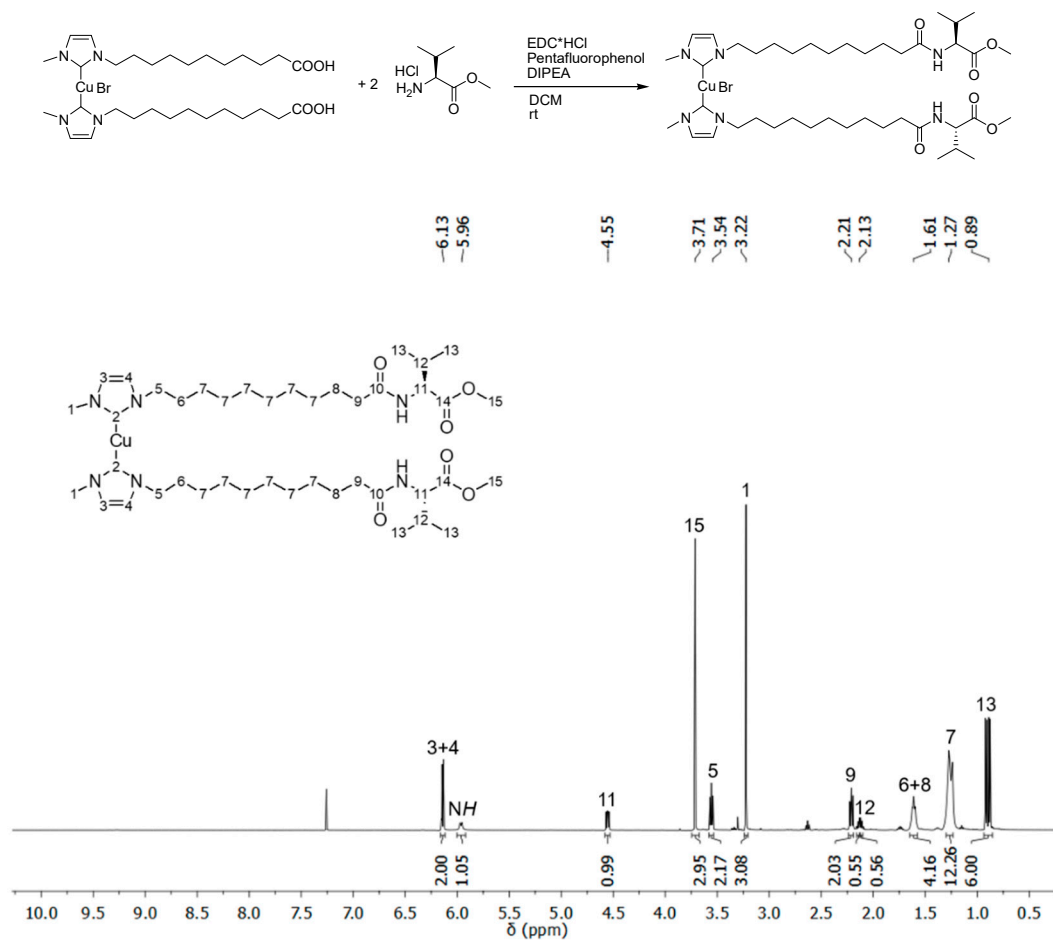

Figure S23. <sup>1</sup>H NMR spectrum of  $[\text{Cu}(\text{C}_{10}\text{COOH-Val-NHC})_2]\text{Br}$  (**12**).

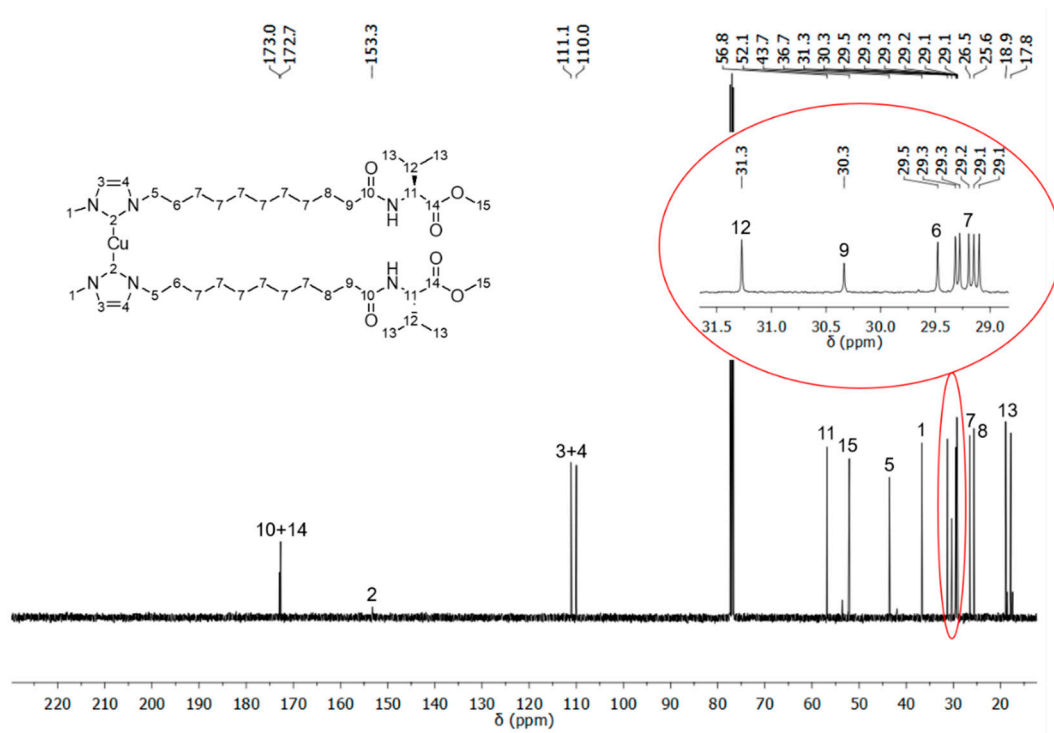

Figure S24.  $^{13}\text{C}$  NMR spectrum of  $[\text{Cu}(\text{C}_{10}\text{COOH-Val-NHC})_2]\text{Br}$  (12).

### 14. Characterization of the polymeric catalyst (13) [6,7]

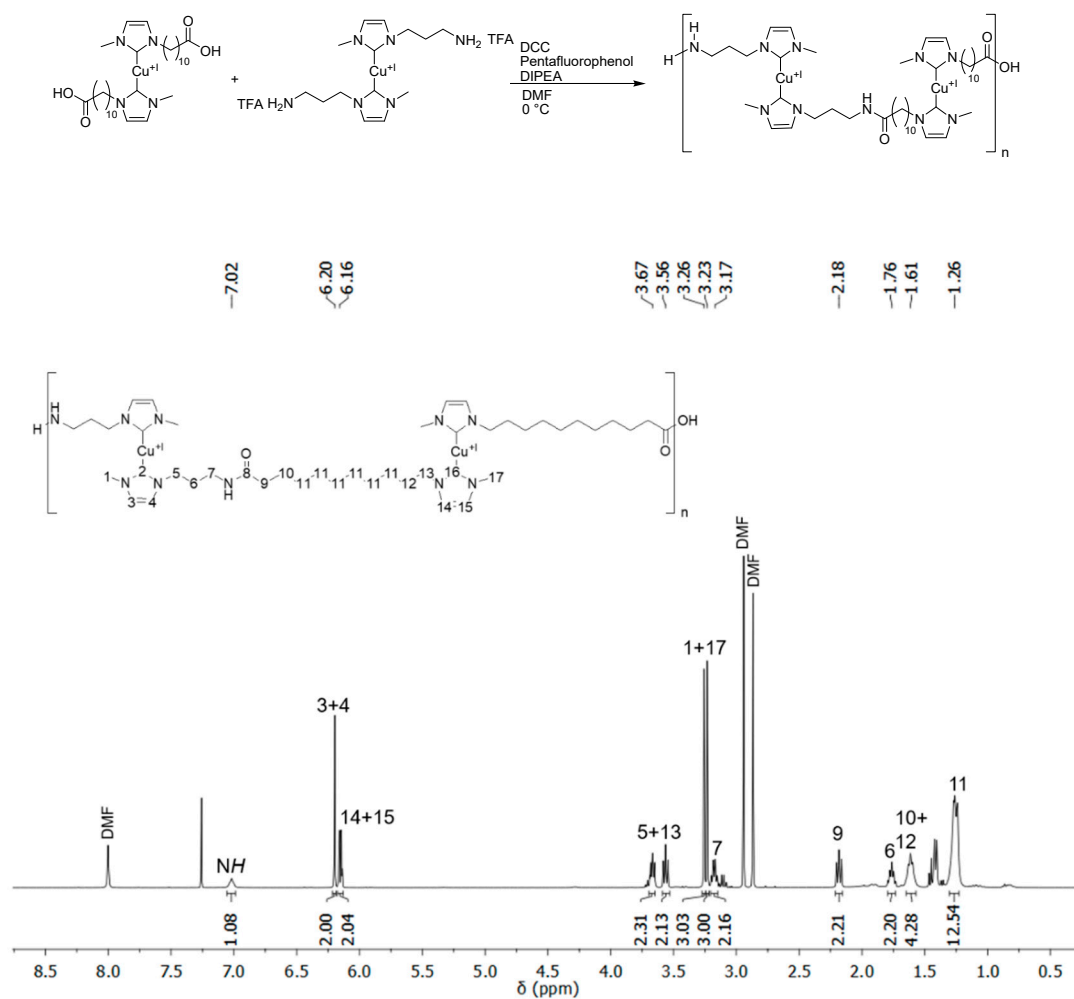

Figure S25.  $^1\text{H}$  NMR spectrum of the polymeric catalyst 13.

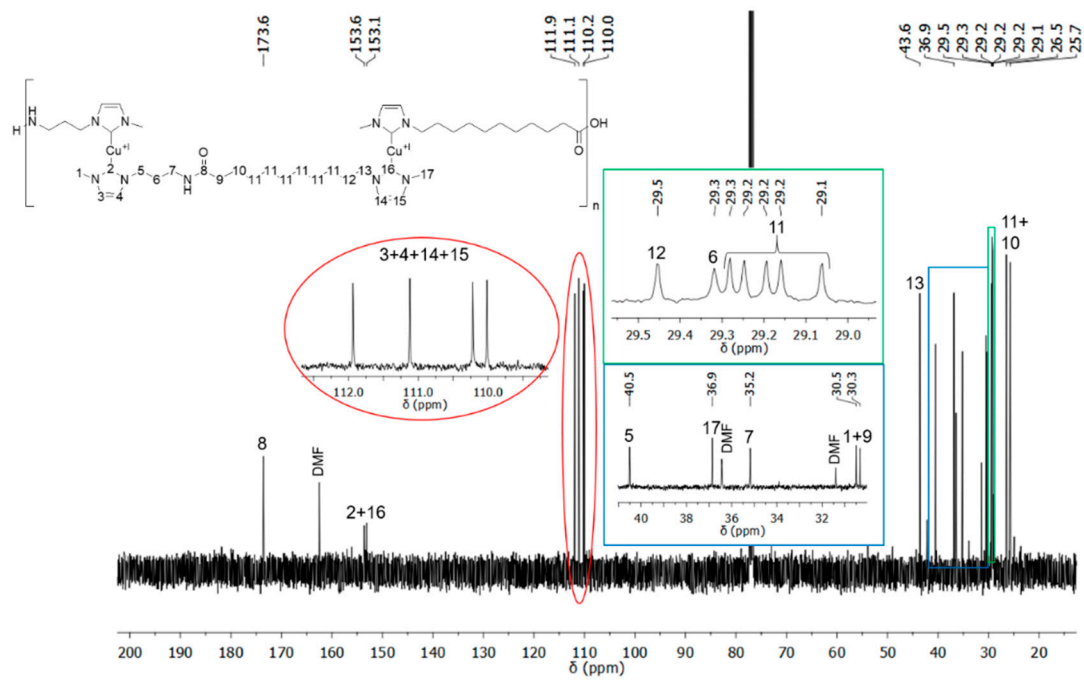

Figure S26.  $^{13}\text{C}$  NMR spectrum of the polymeric catalyst 13.

## 15. Synthesis and characterization of benzyl azide (14) [8]

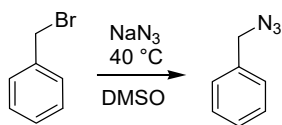

Sodium azide (5.5 g, 84.7 mmol) and benzyl bromide (**14**) (13.2 g, 9.17 mL, 77.0 mmol) were dissolved in DMSO (170.0 mL). The reaction mixture was stirred at 40 °C for 90 h. Afterward, water (50.0 mL) was added and the reaction was further stirred, until it was cooled down to room temperature. The mixture was extracted with Et<sub>2</sub>O (3 × 30.0 mL) and the combined organic phases were washed with water (2 × 50.0 mL) and brine (50.0 mL). Subsequently the organic phase was dried over Na<sub>2</sub>SO<sub>4</sub>, filtered and the solvent was removed under reduced pressure. Yield: 9.45 g, 71.0 mmol, 92%.

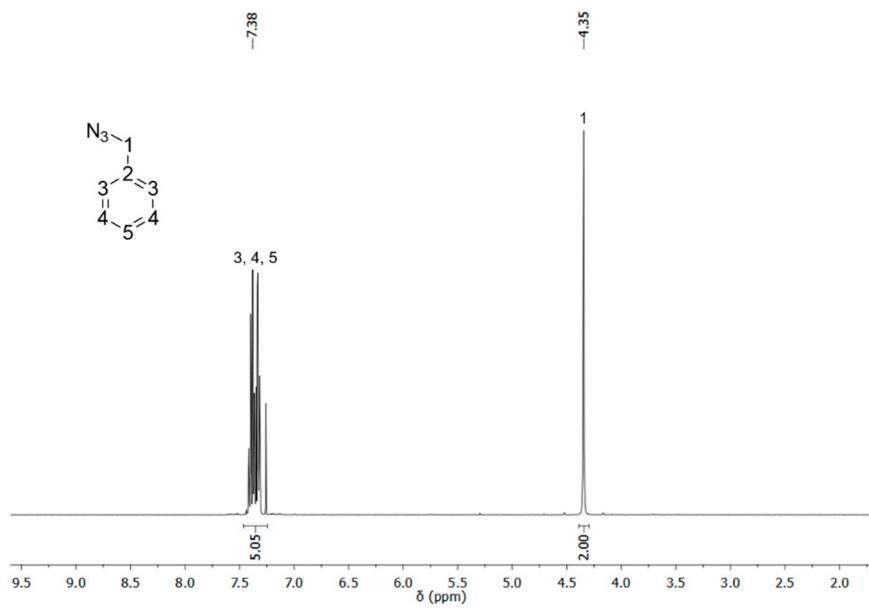

Figure S27. <sup>1</sup>H NMR spectrum of benzyl azide (14).



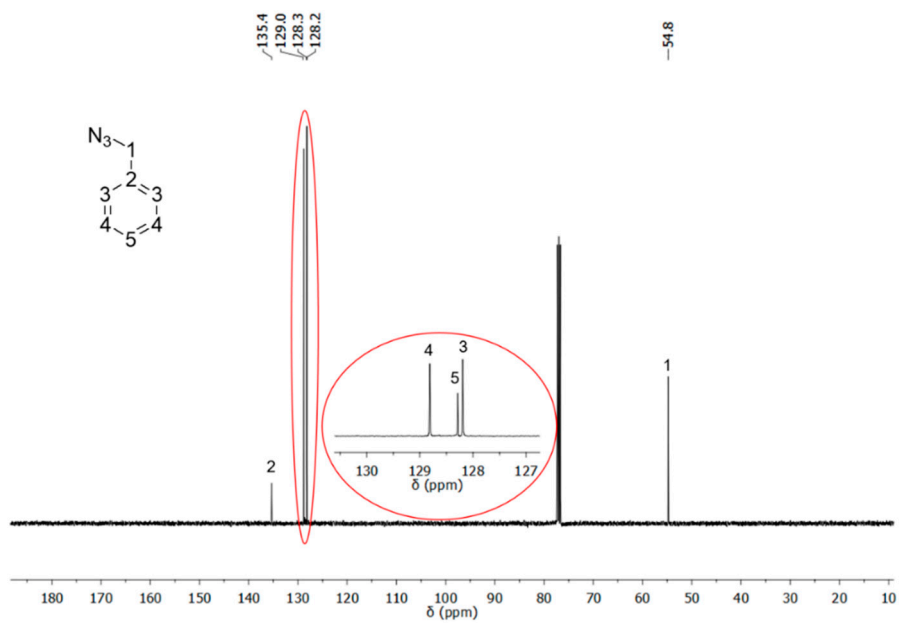

Figure S28.  $^{13}\text{C}$  NMR spectrum of benzyl azide (14).

## 16. Synthesis and characterization of 3-(10-carboxydecyl)-1-methyl-1*H*-imidazolium bromide

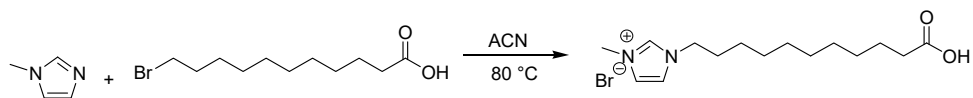

11-Bromoundecanoic (10.0 g, 37.73 mmol) and 1-methylimidazole (3.27 g, 3.13 mL, 39.62 mmol) were dissolved in ACN (27.0 mL). The reaction mixture was stirred for 48 h at 80 °C. Afterward, the solvent was removed and the crude product was washed with Et<sub>2</sub>O (2 × 20.0 mL) and cold ACN (4 × 10.0 mL). The pure product was obtained as a white, crystalline solid. Yield: 11.63 g, 33.49 mmol, 89%.

<sup>1</sup>H NMR (400 MHz, DMSO-*d*<sub>6</sub>, 27 °C): δ (ppm) = 11.94 (s, 1H), 9.13 (s, 1H), 7.76 (s, 1H), 7.69 (s, 1H), 4.14 (t, 2H), 3.83 (s, 3H), 2.16 (t, 2H), 1.75 (m, 2H), 1.46 (m, 2H), 1.22 (m, 12H); <sup>13</sup>C NMR (100 MHz, DMSO-*d*<sub>6</sub>, 27 °C): δ (ppm) = 174.9, 136.9, 124.0, 122.7, 49.2, 36.2, 34.1, 29.8, 29.2, 29.2, 29.1, 29.0, 28.8, 25.9, 25.0.

## References

1. Chun, J.; Lee, H.S.; Jung, I.G.; Lee, S.W.; Kim, H.J.; Son, S.U. Cu<sub>2</sub>O: A versatile reagent for base-free direct synthesis of NHC-copper complexes and decoration of 3D-MOF with coordinatively unsaturated NHC-copper species. *Organometallics* **2010**, *29*, 1518–1521, doi:10.1021/om900768w.
2. Chen, Y.; Guan, Z. Bioinspired modular synthesis of elastin-mimic polymers to probe the mechanism of elastin elasticity. *J. Am. Chem. Soc.* **2010**, *132*, 4577–4579, doi:10.1021/ja9104446.
3. Roy, S.; Eastman, A.; Gribble, G.W. Synthesis of bisindolylmaleimides related to GF109203x and their efficient conversion to the bioactive indolocarbazoles. *Org. Biomol. Chem.* **2006**, *4*, 3228–3234, doi:10.1039/B607504E.
4. Li, F.; Bravo-Rodriguez, K.; Phillips, C.; Seidel, R.W.; Wieberneit, F.; Stoll, R.; Doltsinis, N.L.; Sanchez-Garcia, E.; Sander, W. Conformation and dynamics of a cyclic disulfide-bridged peptide: Effects of temperature and solvent. *J. Phys. Chem. B* **2013**, *117*, 3560–3570, doi:10.1021/jp4007334.
5. Tauchman, J.; Císařová, I.; Štěpnička, P. Chiral phosphanylferrocenecarboxamides with amino acid pendant groups as ligands for Cu-mediated asymmetric conjugate additions of diethylzinc to chalcones—Structural characterisation of precursors to the Cu catalyst. *Eur. J. Org. Chem.* **2010**, *2010*, 4276–4287, doi:10.1002/ejoc.201000480.
6. Meneses, C.; Nicoll, S.L.; Trembleau, L. Multigram-scale synthesis of short peptides via a simplified repetitive solution-phase procedure. *J. Org. Chem.* **2010**, *75*, 564–569, doi:10.1021/jo902116p.
7. Cinzia, C.; Anna, B. Synthesis of  $\alpha$ -N-linked glycopeptides. *Eur. J. Org. Chem.* **2011**, *2011*, 3911–3919, doi:10.1002/ejoc.201100124.
8. Alvarez, S.G.; Alvarez, M.T. A practical procedure for the synthesis of alkyl azides at ambient temperature in dimethyl sulfoxide in high purity and yield. *Synthesis* **1997**, *1997*, 413–414, doi:10.1055/s-1997-1206.
